# Supplementary material for: Expression Pattern and Ligand Binding Characteristics Analysis of Chemosensory Protein SnitCSP2 from Sirex nitobei
Source: MDPI journal article supplement (doi:10.3390/insects14070583), 2023-06-27
Supplement: s1 [file s1]

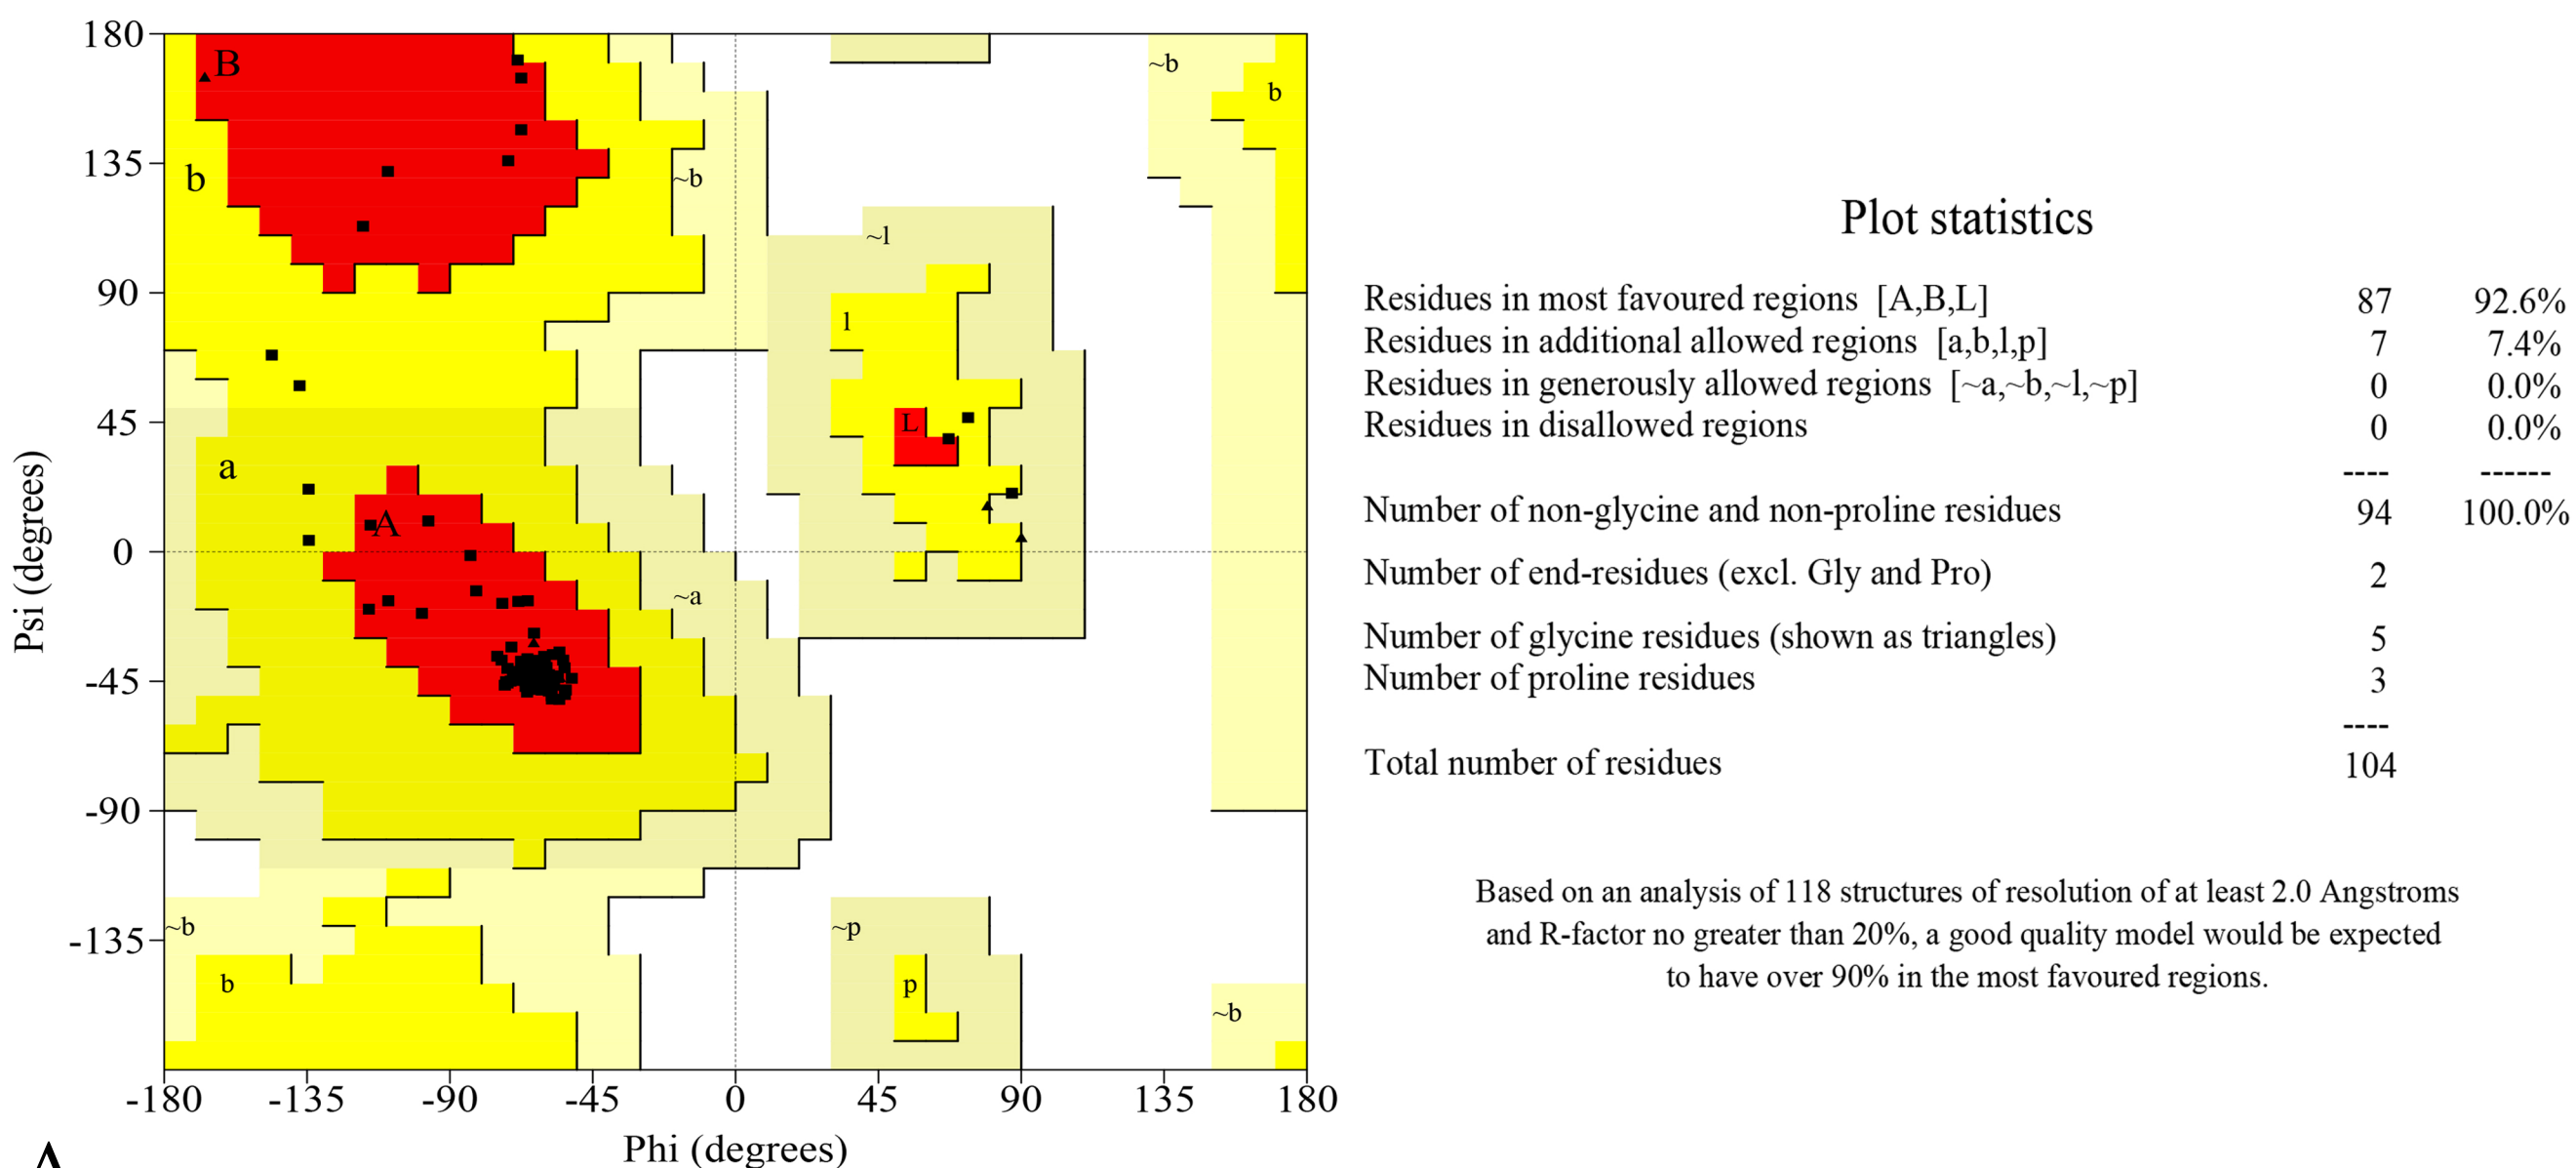

A

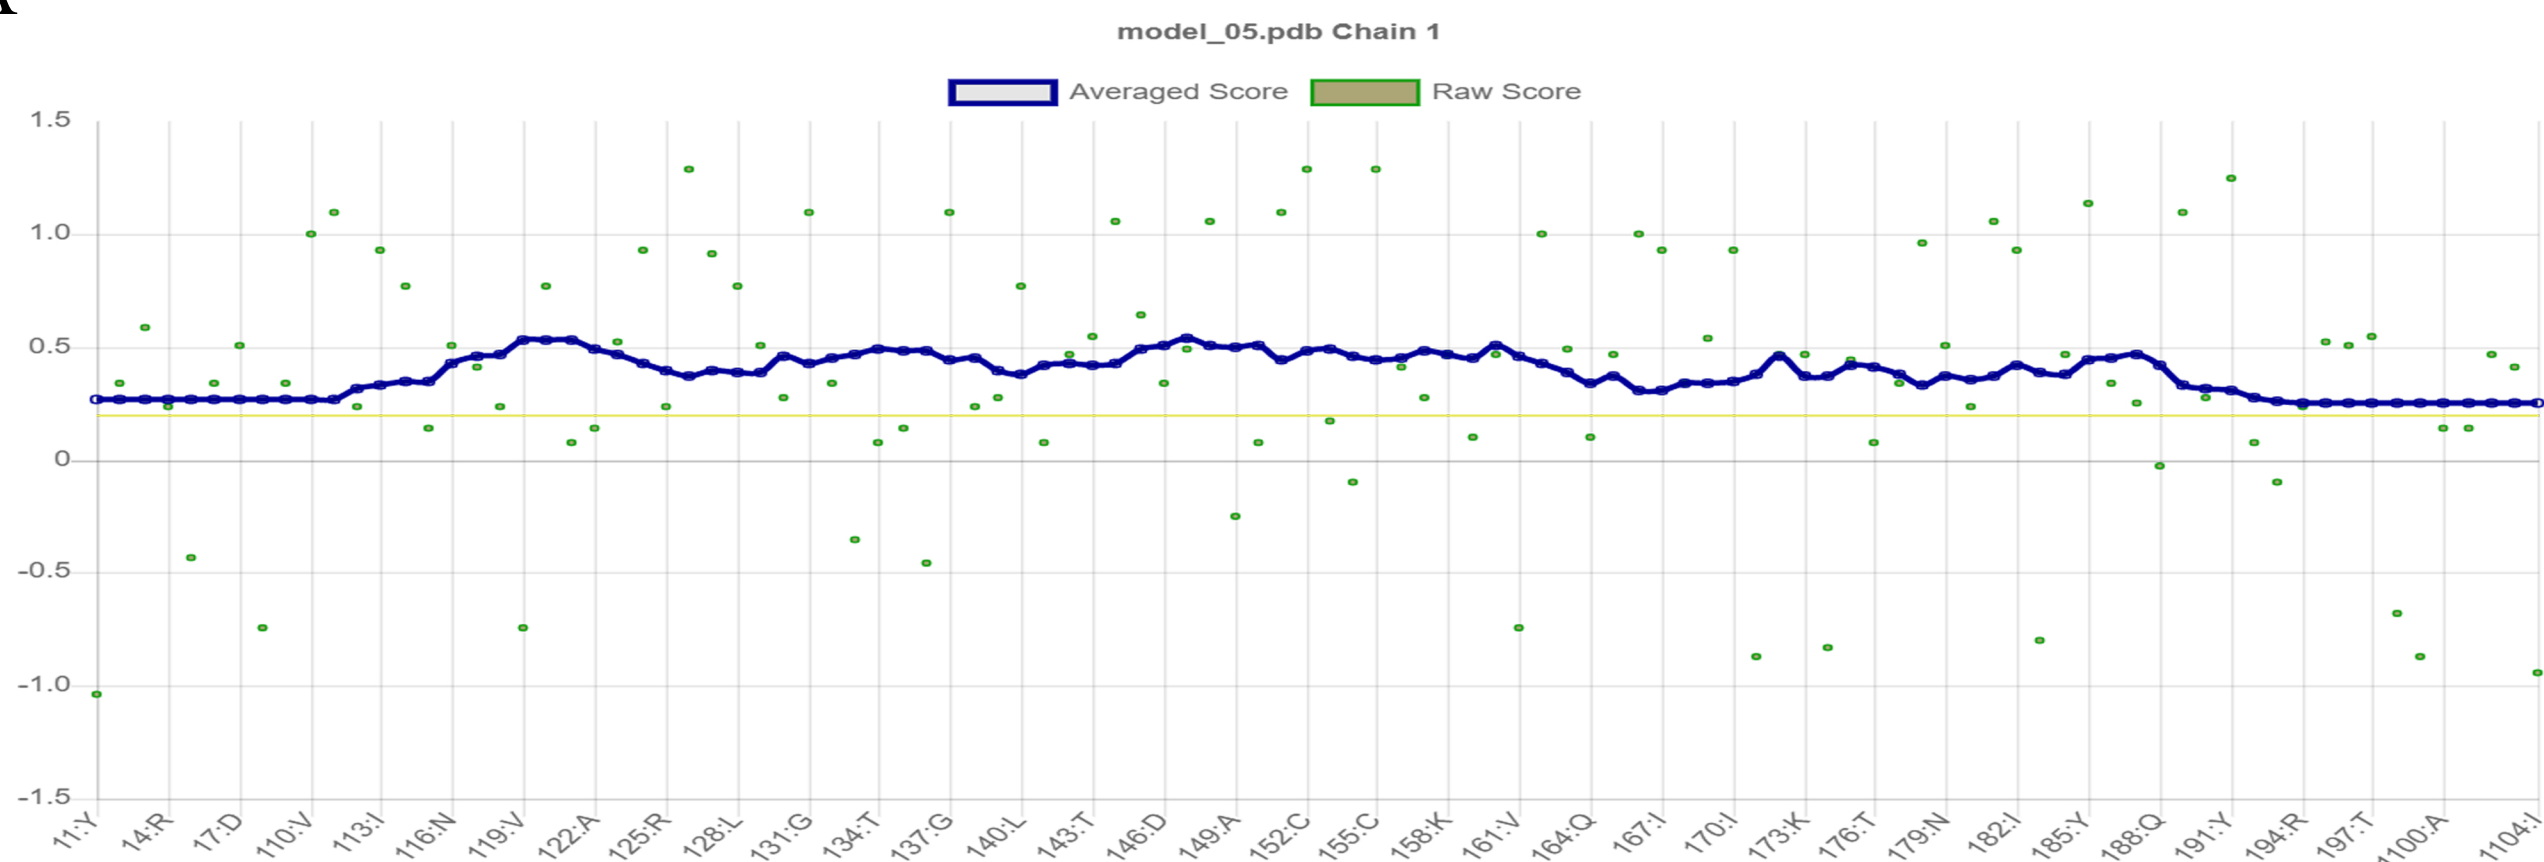

B

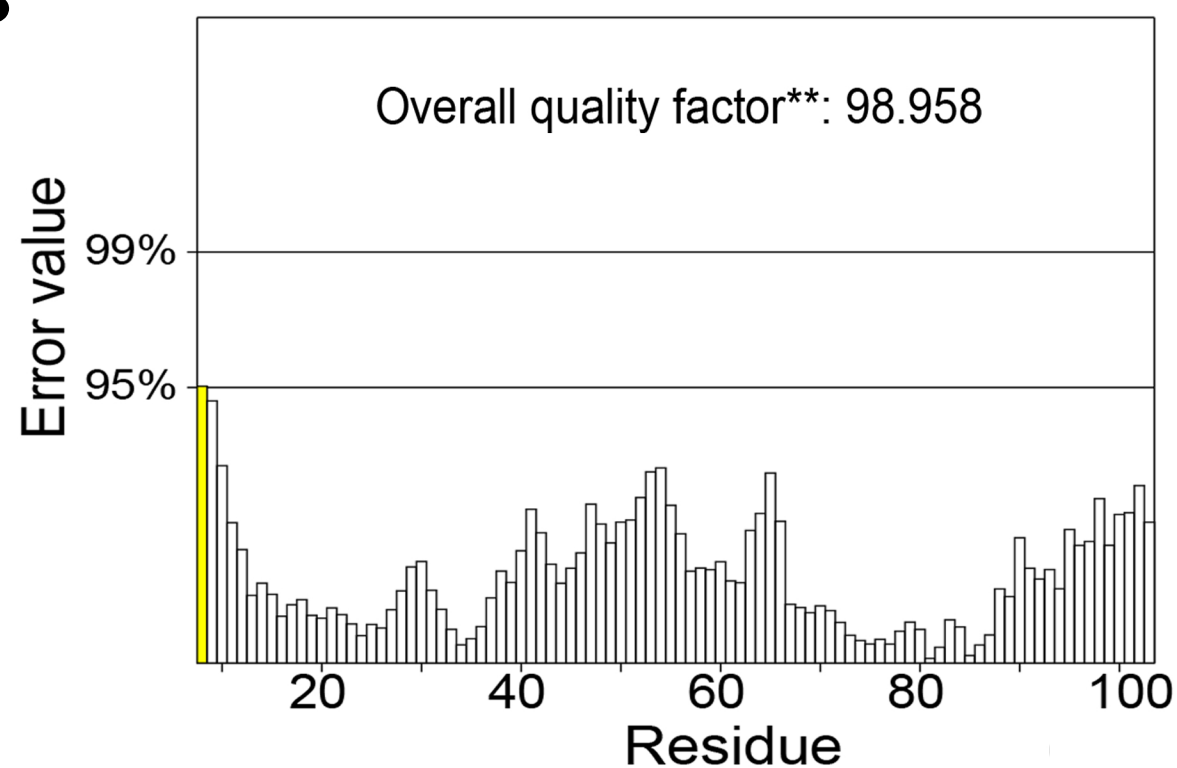

\*On the error axis, two lines are drawn to indicate the confidence with which it is possible to reject regions that exceed that error value.

\*\*Expressed as the percentage of the protein for which the calculated error value falls below the 95% rejection limit. Good high resolution structures generally produce values around 95% or higher. For lower resolutions (2.5 to 3Å) the average overall quality factor is around 91%.

C

Figure S1. Quality evaluation of the SnitCSP2 model. (A) Ramachandran plot; (B) Verify-3D; (C) ERRAT.
